# Supplementary material
Source: PubMed Central journal article supplement (PMC4894459)
Supplement: NIHMS68576-supplement-Supplementary_Appendix.pdf [file NIHMS68576-supplement-Supplementary_Appendix.pdf]

## Appendix A: Figures

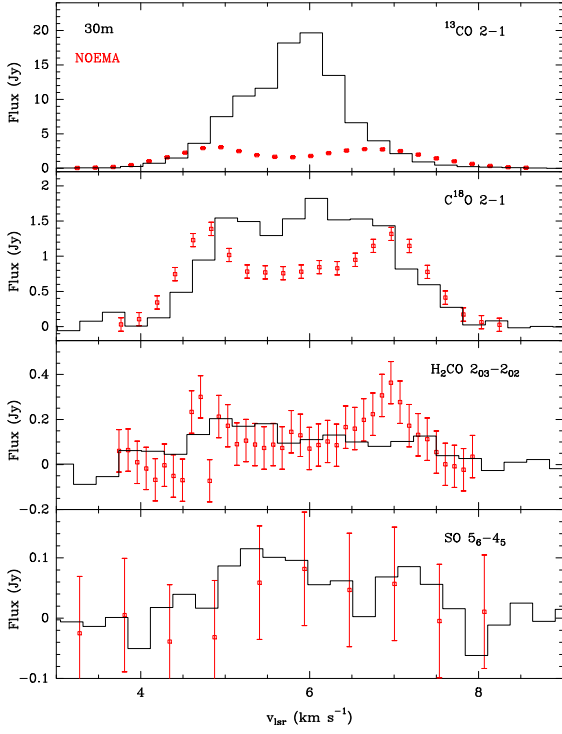

**Fig. A.1.** Comparison between the single-dish IRAM 30m spectra (*black histogram*) published by Pacheco-Vázquez et al. (2015) and NOEMA interferometric spectra (*red points*). We note that the 30m observations were performed using the wobbler switching procedure and the cloud emission is subtracted with the OFF position. The absence of missing flux does not imply the absence of an extended component.

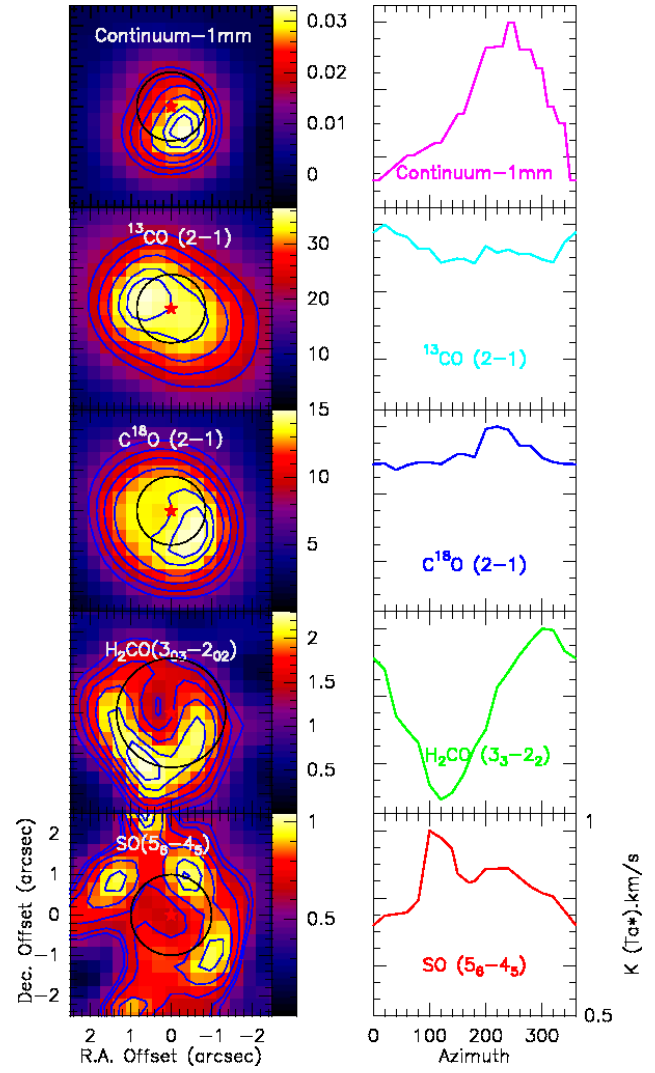

**Fig. A.4.** Molecular intensity as a function of the azimuthal angle (*right*) over a circle of 0.8 arcsec for the continuum, the  $^{13}\text{CO}$  and the  $\text{C}^{18}\text{O}$  maps, and 1.3 and 1 arcsec for  $\text{H}_2\text{CO}$  and  $\text{SO}$ , respectively, around the central position (*left*).

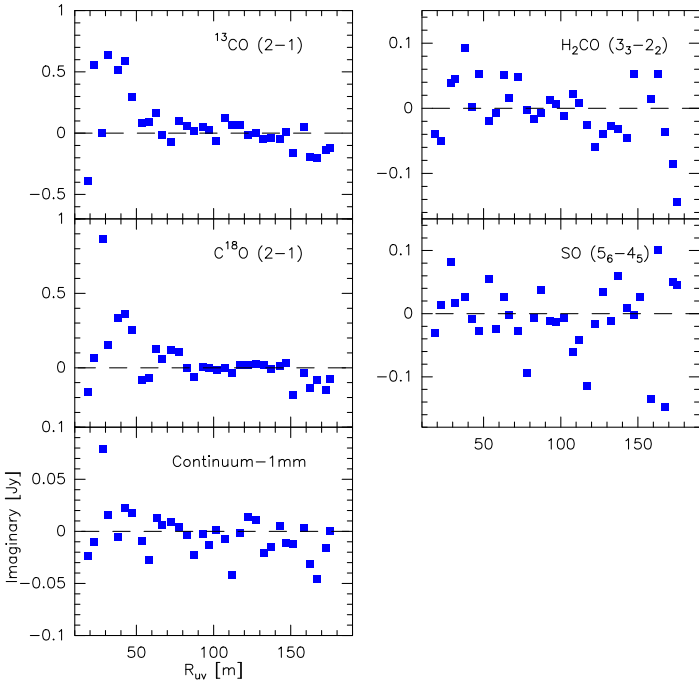

**Fig. A.2.** Imaginary part of the observed visibilities for the dust emission and the  $^{13}\text{CO}$   $J=2 \rightarrow 1$ ,  $\text{C}^{18}\text{O}$   $J=2 \rightarrow 1$ ,  $\text{SO}$   $J=5_6 \rightarrow 4_5$ , and  $\text{H}_2\text{CO}$   $J=3_{03} \rightarrow 2_{02}$  lines.

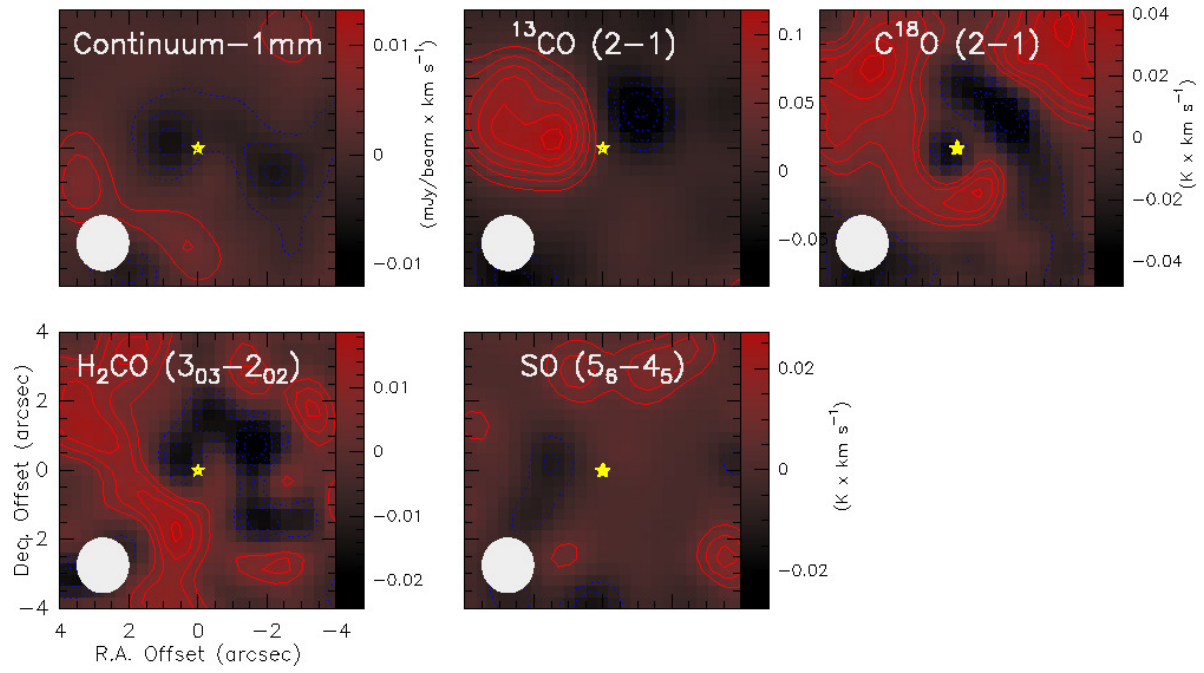

**Fig. A.3.** Residual maps after subtracting the best fit model from Table 2.
